# Supplementary material for: Maternal Huluwa regulates postfertilization microtubule array organization for asymmetrical transport of dorsal determinants in zebrafish
Source: Research Square preprint supplement (doi:10.21203/rs.3.rs-8615300/v1), 2026-01-21
Supplement: Supplementary file 1 [file 51112223fa6ec4e6b948458e.docx]

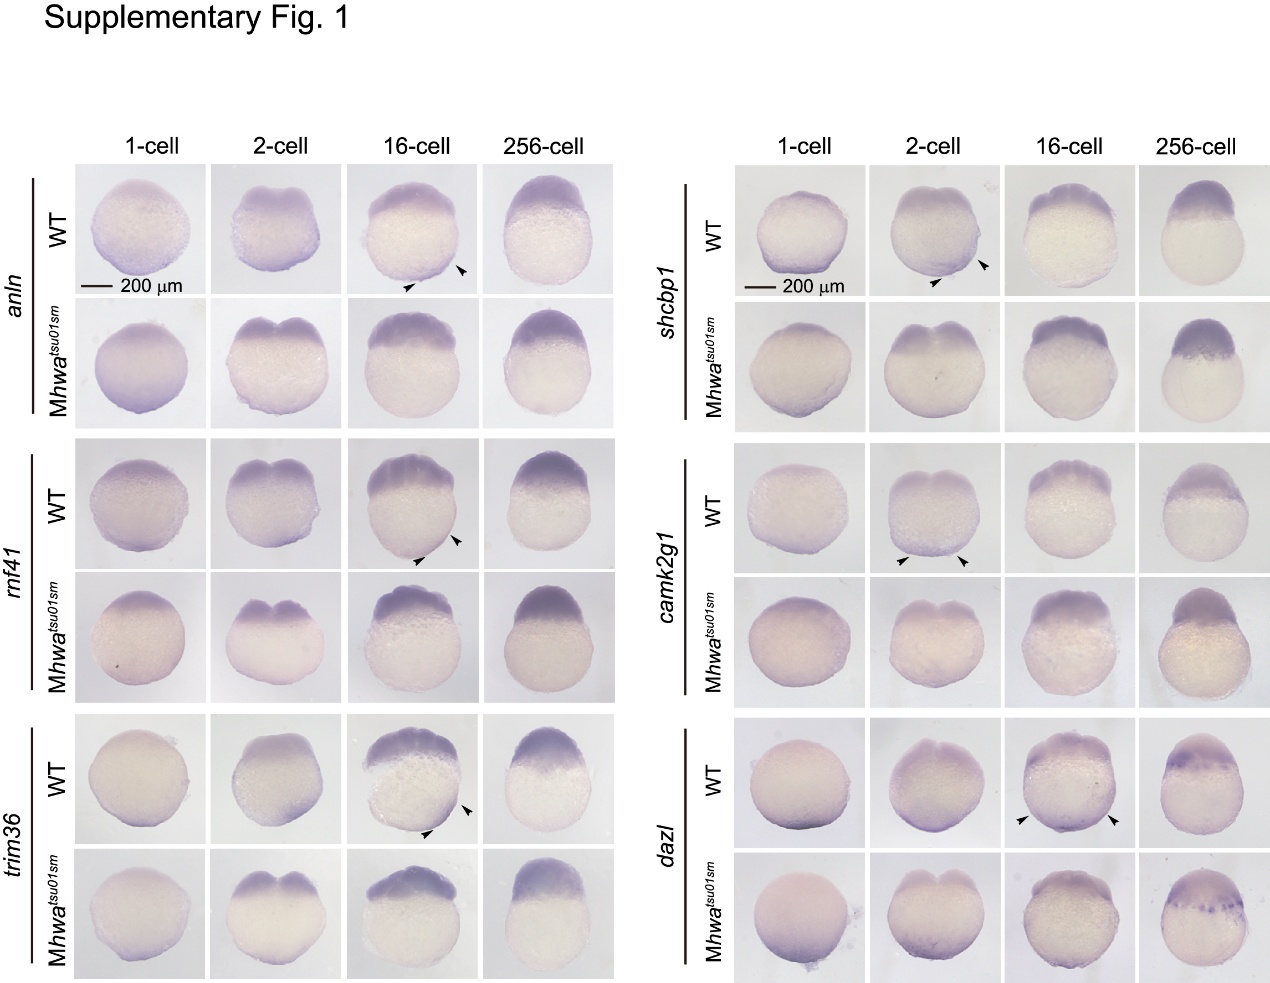


**Supplementary Fig. 1.** **Impaired vegetal localization and transport of maternal mRNAs in M*hwatsu01sm* mutants.**

Whole-mount in situ hybridization of the indicated maternal mRNAs in WT and M*hwatsu01sm* mutant embryos at indicated stages. Black arrows indicated vegetally localized mRNAs in WT embryos at stages where corresponding signals were absent or markedly reduced at the vegetal pole in mutants.


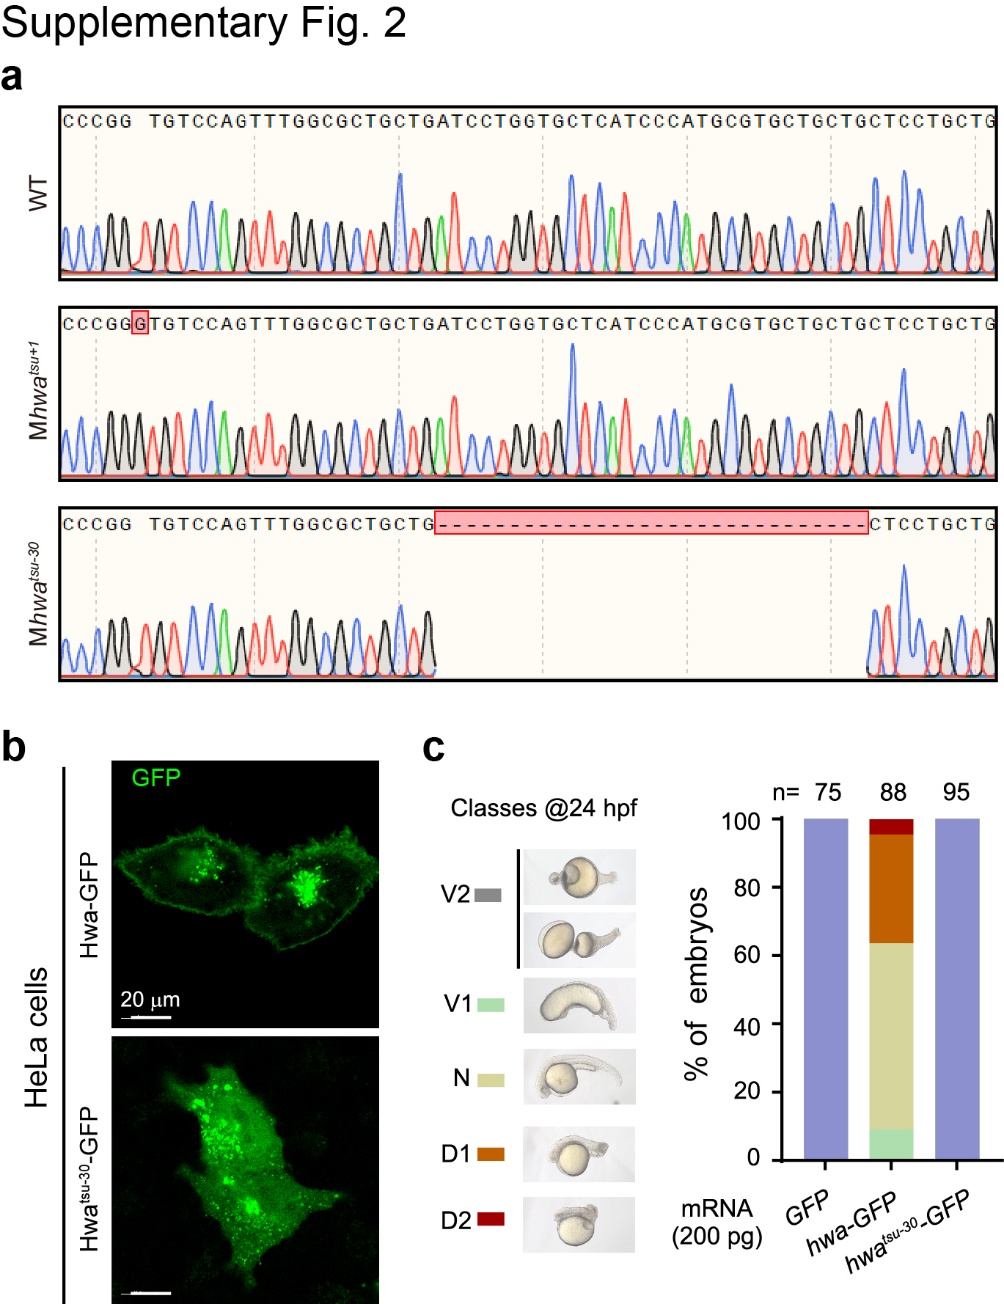


**Supplementary Fig. 2. Characterization of M*hwatsu+1* and M*hwatsu-30* mutants.**

**a**, Sequences of *hwa* cDNA from WT, M*hwatsu+1* or M*hwatsu-30* mutant embryos at the 1c stage, respectively. Mutated or deleted bases were highlighted. **b**, Subcellular localization of overexpressed Hwa-GFP Hwatsu-30 in HeLa cells. Plasmid containing a corresponding hwa allele fused to GFP was transfected into HeLa cells and immunostained with anti-GFP antibody 24 h post-transfection. Note that Hwatsu-30 mutant form, which lacks part of the transmembrane domain, was not enriched on the plasma membrane. **c**, Effect of *hwatsu-30* mutant mRNA overexpression in M*hwatsu01sm* mutants. was injected into 1c stage M*hwatsu01sm* mutants was injected with *hwatsu-30* mRNA (200 pg per embryo) and observed for morphology at 24 hpf. Left, phenotypic classes; right, ratio of embryos. n, number of observed embryos.


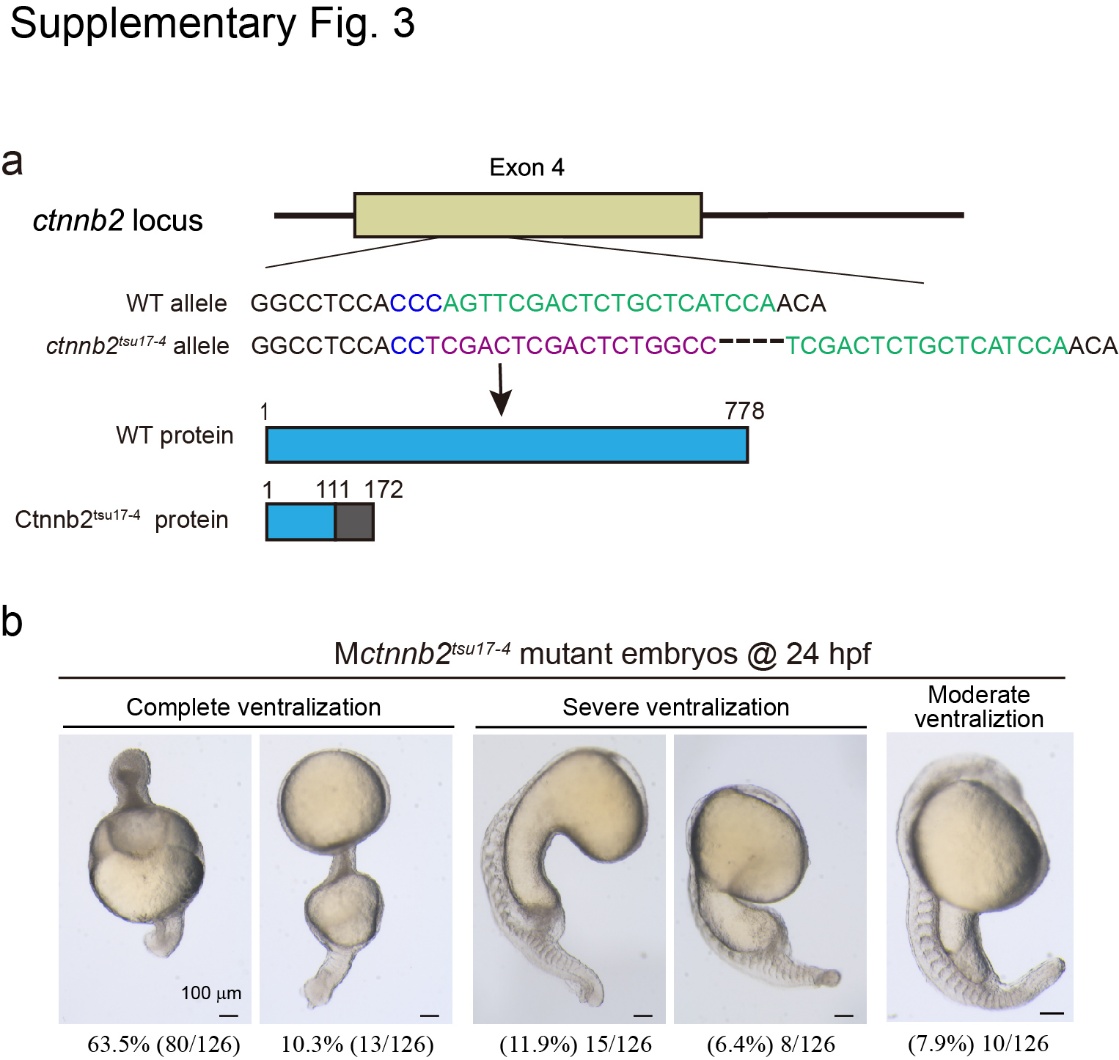


**Supplementary Fig. 3**. **Generation and characterization of maternal *ctnnb2tsu17-4* mutants.**

**a,** Illustration of the mutant allele. Top, position and sequences of WT and the mutant allele. The gRNA target site and PAM sequence were highlighted in green and blue, respectively. Bottom: putative proteins with residue positions indicated. **b**, Representative morphological changes and ratio of M*ctnnb2tsu17-4* mutant embryos at 24 hpf. All embryos were derived from one *ctnnb2tsu17-4* mutant female crossed to one WT male.


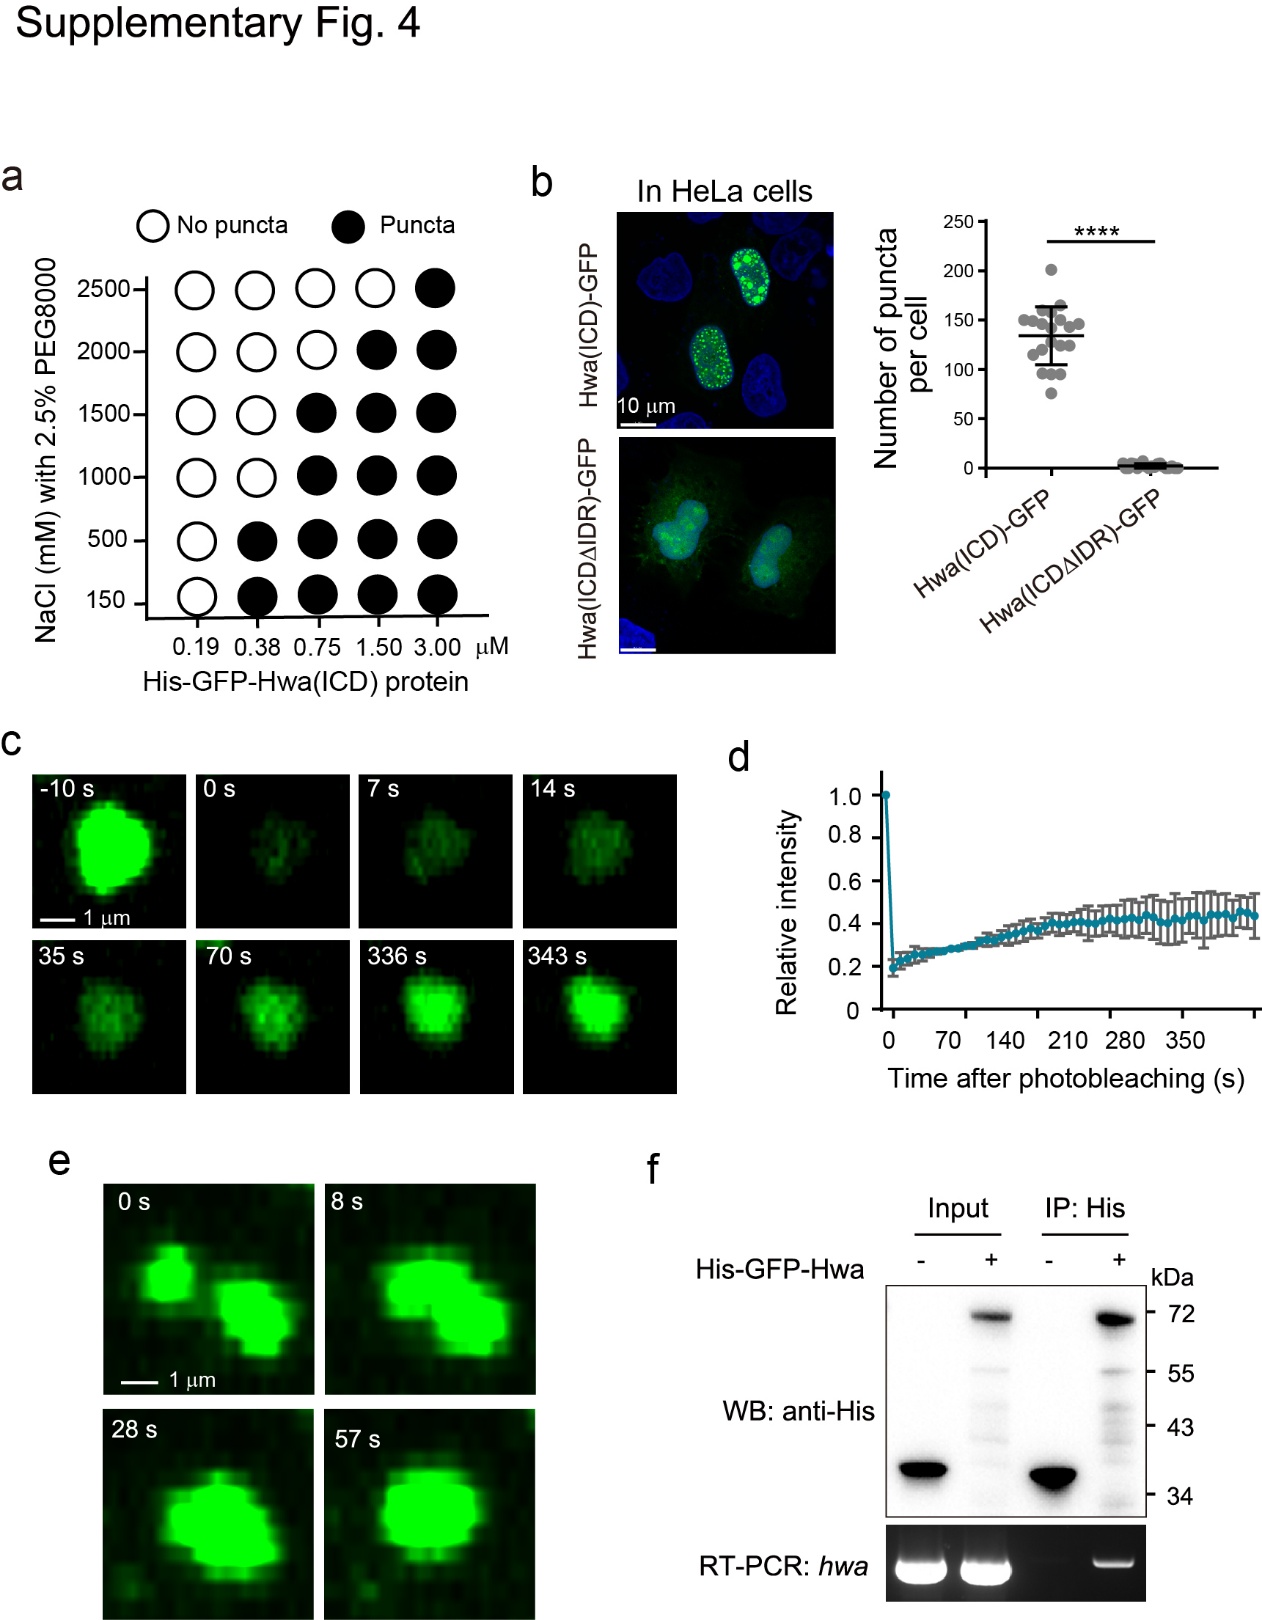


**Supplementary Fig. 4. Hwa could undergo phase transition in cultured human cells.**

**a**,His-GFP-Hwa(ICD) phase transition induced by 2.5% PEG8000 in different protein and salt concentrations in vitro. **b**,Condensate formation of Hwa-GFP variants expressed in 20 HeLa cells. Left, representative images; right, counted puncta number per cell. Two-tailed unpaired *t*-test was performed with ****P < 0.0001. **c**, Representative images showing fluorescence recovery after photobleaching (FRAP) of one Hwa(ICD)-GFP punctum in HeLa cells. **d**, Quantification of fluorescence recovery. Three puncta were analyzed. **e**, Representative time-lapse confocal images showing fusion of two Hwa(ICD)-GFP puncta in HeLa cells. **f**, RNA immunoprecipitation assay showing association of His-GFP-Hwa protein with *hwa* mRNA. Synthetic *hwa* mRNA including 5’UTR, coding region, and 3’UTR was incubated with purified His-GFP-Hwa protein, followed by immunoprecipitation with His antibody and then RNA extraction for RT-PCR.


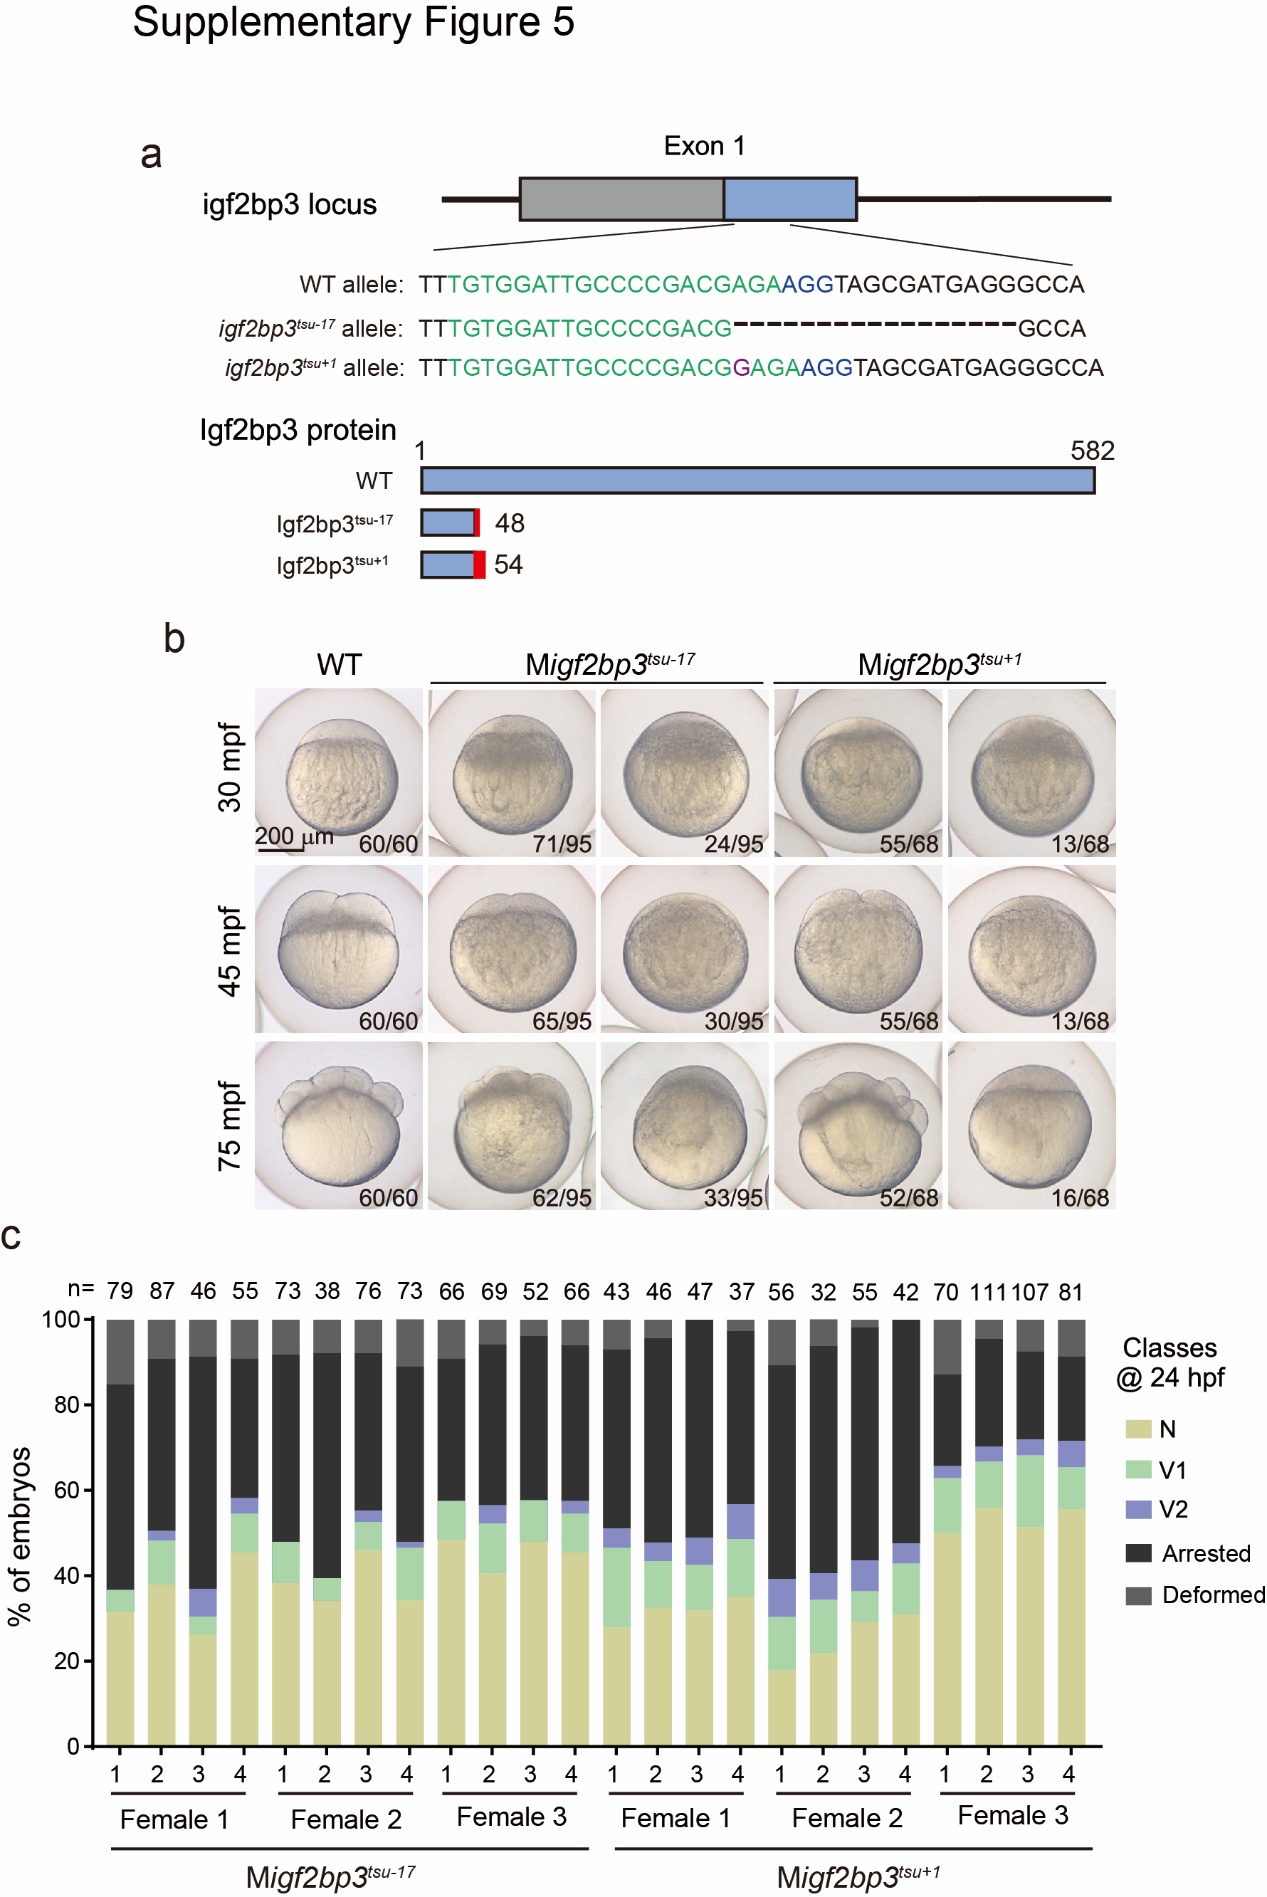


**Supplementary Fig. 5. Generation and characterization of maternal *igf2bp3* mutants.**

**a**, Schematic of two igf2bp3 mutant allele sequences and their putative encoding peptides. Altered regions of the putative peptides were shown in red. **b**, Morphology of maternal *igf2bp3* mutant embryos during early cleavage period. The ratio of embryos with the representative pattern was indicated. **c**, RT-qPCR shows significantly reduced *igf2bp3* mRNA levels in M*igf2bp3* 1-cell embryos compared to WT. Two-tailed unpaired t-test; ****P < 0.0001. **c**, Ratio of M*igf2bp3* embryos with different phenotypes at 24 hpf in different batches. Representative images for different phenotypic classes were shown in main Fig. 6e. For each mutant line, 3 homozygous mutant females were individually mated to WT male for 4 consecutive times (1-4). n, total number of observed embryos.


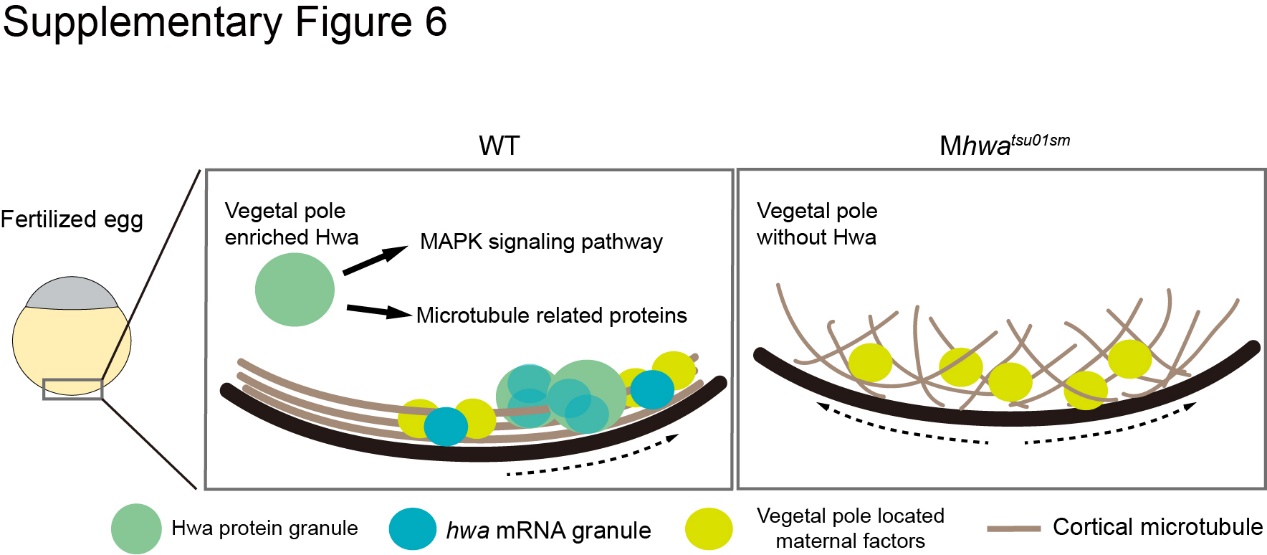


**Supplementary Fig. 6. Work model for Hwa regulation of the VPM microtubule network in fertilized eggs.**
