# Supplementary material for: Maternal Huluwa regulates postfertilization microtubule array organization for asymmetrical transport of dorsal determinants in zebrafish
Source: Research Square preprint supplement (doi:10.21203/rs.3.rs-8615300/v1), 2026-01-21
Supplement: Supplementary file 2 [file 540637e9b3e4c92060f1ec2c.docx]

**Supplementary Table 1**

Primers for *hwa* promoter sequence, mutant identification and RT-qPCR.

| **Sequence** | **Forward primer (5'-3')** | **Reverse primer (5'-3')** |
| --- | --- | --- |
| *hwa* promoter (including 5’ UTR) | TTCTGTCGTCATTTACGCATCCTCAG | TTCATCACAAATCAAAGATAAAACAATGAT |
| *hwa-ID* | GCTGCGACTCAACTGTCGACT | TCCGGAACAGTTTGTAGCCC |
| *igf2bp3-ID* | AATAAGCTGTACATCGGGAAC | TTGTACTTCATTTAAAGGGCGG |
| *ctnnb2-ID* | CAGTATGCCATGACGCGGGC | CAGCATCTGCGACGGCTCC |
| *hwa-qpcr* | GCATCATCCCACAGGAGAAC | GTGACGTAACTTGGGTCGTA |
| *wnt8a-qpcr* | GGACGTTTGGCTGTAAAAGC | GAATGCGTCTGTCATGGTCA |
| *sybu-qpcr* | GGAAGCTACAAGACCCGAGAAA | TGATGCCATGATTGTCTCCACA |
| *grip2a-qpcr* | CAGCACGTTGAGTTTGGGAGAAG | TGTGAAATACAAAACACTGGTGCTAATGTG |
| *ctnnb2-qpcr* | GTCAGATGCTGCCACAAAGC | GTGAGGTTGGAGAGGATGCC |
| *igf2bp3-qpcr* | AGCGAGTGGAGGGATTTCA | ATTGACGCACCAGCGAAGC |
| *actin-qpcr* | ATGGATGATGAAATTGCCGCAC | ACCATCACCAGAGTCCATCACG |
| *gfp-qpcr* | ATGGTGAGCAAGGGCGAG | AAGCACTGCACGCCGTAG |
