# Supplementary material for: Maternal Huluwa regulates postfertilization microtubule array organization for asymmetrical transport of dorsal determinants in zebrafish
Source: Research Square preprint supplement (doi:10.21203/rs.3.rs-8615300/v1), 2026-01-21
Supplement: Supplementary file 3 [file 668f2677b4476e88b010a8e2.docx]

**Supplementary Table 2**

Primers for probe templates of *in situ* hybridization.

| **Gene** | **Forward primer (5'-3')** | **T7-Reverse primer (5'-3')** |
| --- | --- | --- |
| *wnt8a* | CATAACAACGAAGCTGGTCGACTTG | TAATACGACTCACTATAGGGAGAGGATTACTTCATCCACGACG |
| *grip2a* | CAGCACGTTGAGTTTGGGAGAAGA | TAATACGACTCACTATAGGGTGTGAAATACAAAACACTGGTGCTAATGTGA |
| *sybu* | AGGCTGTTGTGTTATGGGATTGC | TAATACGACTCACTATAGGGAGTGTTCGCTGTACTGTGGCAA |
| *gfp* | ATGGTGAGCAAGGGCGAG | TAATACGACTCACTATAGGGTTACTTGTACAGCTCGTCCATGCC |
| *anln* | TGCCAACAAGCCTGAGTGTG | TAATACGACTCACTATAGGGGGTCTGTAGCAGGAATCCGG |
| *rnf41* | ATGGGGTACGACGTCACCAG | TAATACGACTCACTATAGGGCTATAAGATCTCCTCCACGCCATG |
| *trim36* | AGCGAGAGTGTTTACGGCAG | TAATACGACTCACTATAGGGCTTCACAGGTATGCGAGCCG |
| *shcbp1* | AGCTCCATCAGTATTGTTGACTCCA | TAATACGACTCACTATAGGGTCAGTAATGGAAGGTACCAAAGCTTC |
| *camk2g1* | TCTAGAAACTTCTCAGCTTGCAAAAGT | TAATACGACTCACTATAGGGTCACTGTAATGGGGCAGCTGG |
| *dazl* | ATGGTTCAGGGGGTTCAGTTAC | TAATACGACTCACTATAGGGCTACATAAGGGTTAGCAAAGTCTGCAC |
