# Supplementary figures and images for: Maternal Huluwa regulates postfertilization microtubule array organization for asymmetrical transport of dorsal determinants in zebrafish
Source: Research Square preprint supplement (doi:10.21203/rs.3.rs-8615300/v1), 2026-01-21

# Supplementary Figure 6

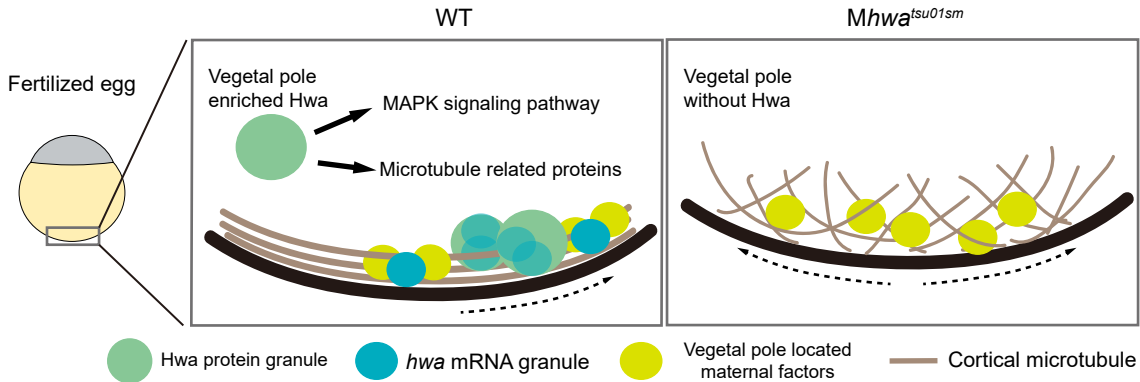

Supplement: Supplementary file 1 [file 335a4ce79ae653bff49683f0.ai]

Supplementary Fig. 1

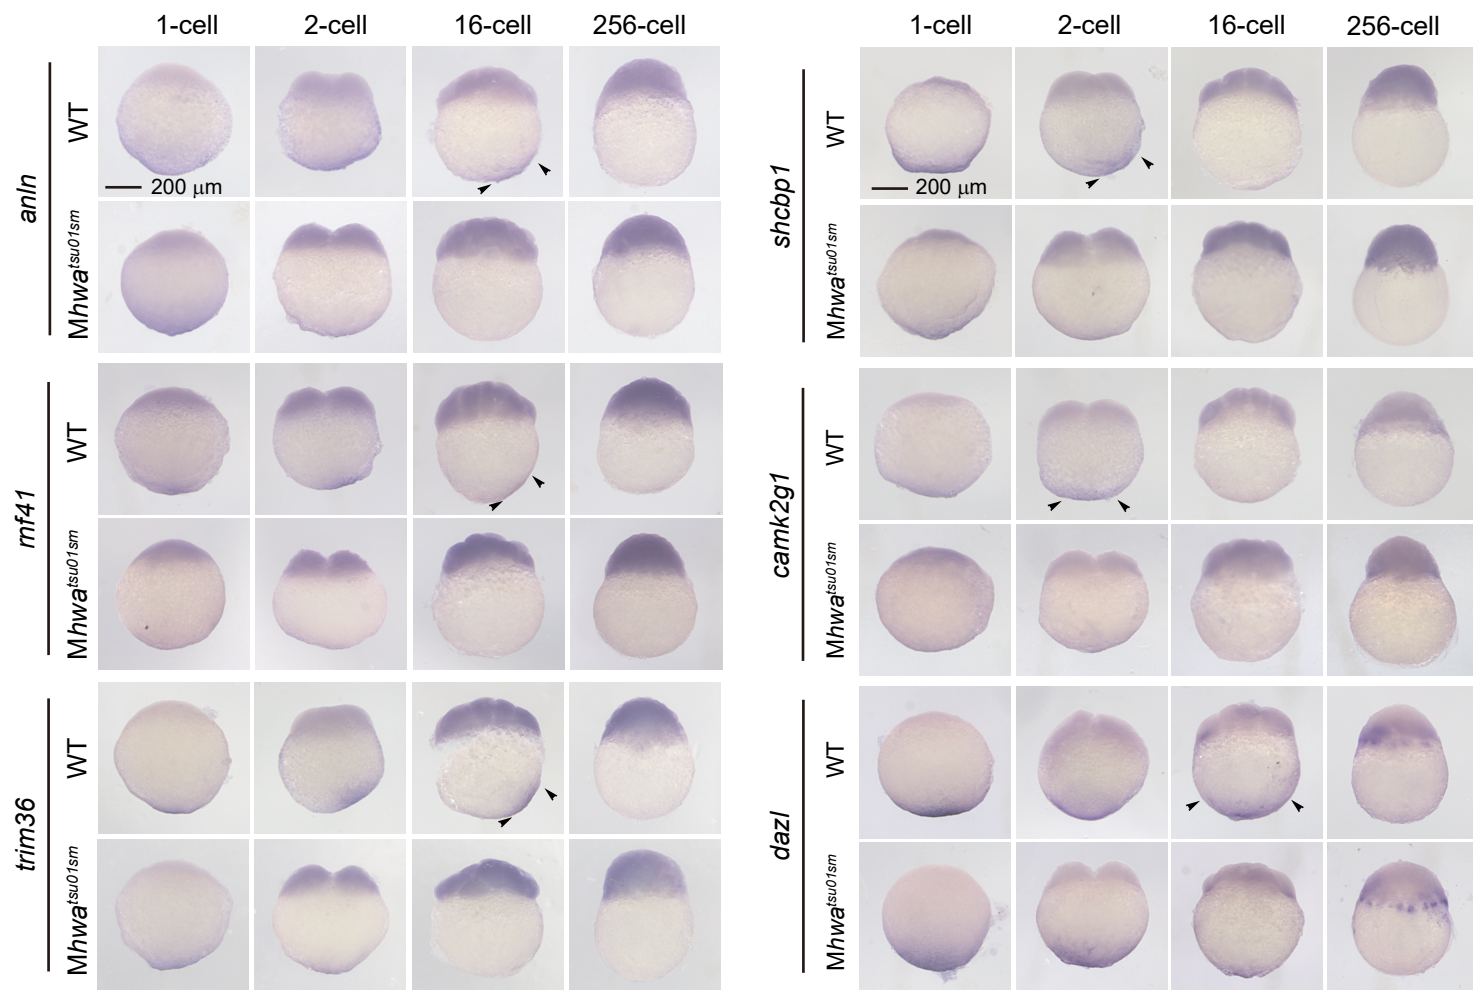

Supplement: Supplementary file 2 [file 4221637005d203176fe8cb83.pdf]
